# Supplementary material for: MicroRNAs Targeting Caspase-3 and -7 in PANC-1 Cells
Source: Int J Mol Sci. 2018 Apr 16;19(4):1206. doi: 10.3390/ijms19041206 (PMC5979519; doi:10.3390/ijms19041206)
Supplement: Supplementary file 1 [file ijms-19-01206-s001.pdf]

## MicroRNAs targeting caspase-3 and -7 in PANC-1 cells

Jong Kook Park <sup>1,\*</sup>, Andrea I. Doseff <sup>2</sup> and Thomas D. Schmittgen <sup>3,\*</sup>

<sup>1</sup> Department of Biomedical Science and Research Institute for Bioscience & Biotechnology, Hallym University, Chuncheon 24252, Republic of Korea

<sup>2</sup> Department of Physiology and Department of Pharmacology and Toxicology, Michigan State University, East Lansing, MI48824, USA; Doseffan@msu.edu

<sup>3</sup> Department of Pharmaceutics, College of Pharmacy, University of Florida, Gainesville, FL 32610, USA

\* Correspondence: tschmittgen@cop.ufl.edu (T.D.S.); jkp555@hallym.ac.kr (J.K.P.); Tel.: +1-352-273-8028 (T.D.S.); +82-33-248-2114 (J.K.P.)

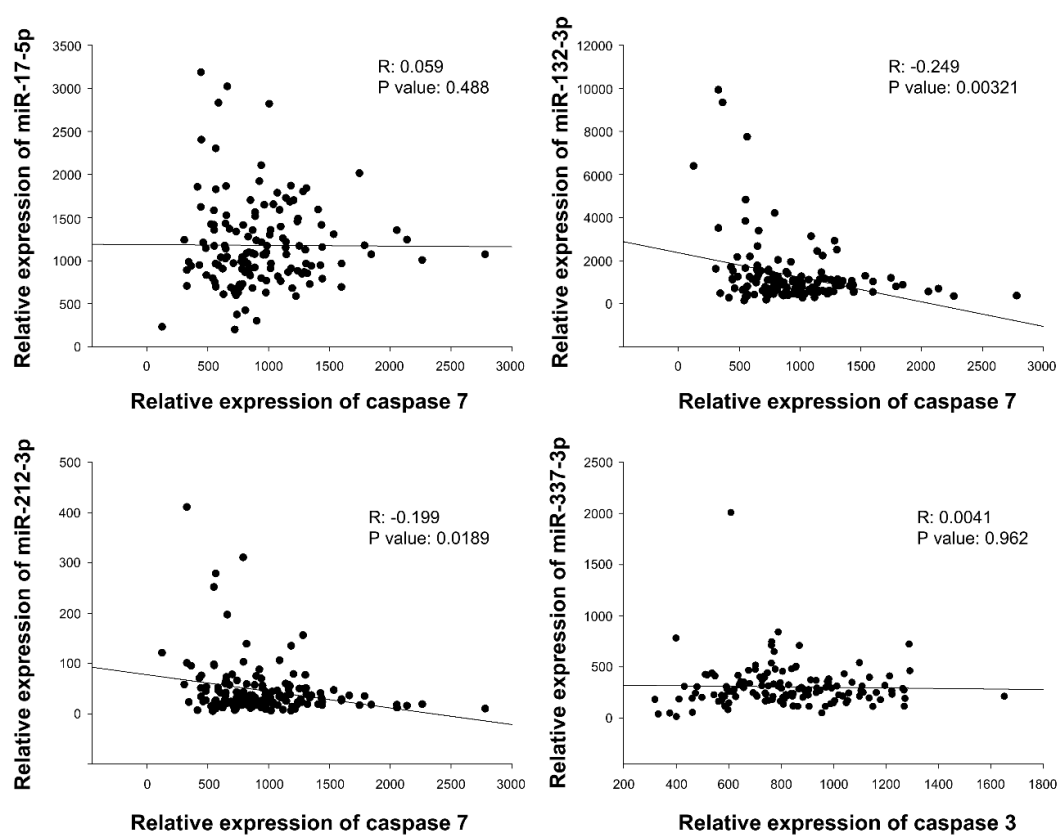

**Figure S1.** Spearman's correlation between miRNAs and target gene expression. RNA sequencing data of 139 pancreatic ductal adenocarcinoma patients were downloaded from the TCGA data portal. base. The significance of the inverse association between each of these miRNA and mRNA was assessed by the Spearman's correlation coefficient. P values less than 0.05 were considered statistically significant.

**Table S1.** Clinical data and tumor pathology

| Normal pancreas tissues           |          |                              |                            |                 |
|-----------------------------------|----------|------------------------------|----------------------------|-----------------|
| Sample No.                        | Supplier | Age (years)/gender           | Cause of death             |                 |
| N1                                | Ambion   | 82/Female                    | Emphysema                  |                 |
| N2                                | Ambion   | 20/Male                      | Head trauma                |                 |
| N3                                | Ambion   | 71/Male                      | Cerebral vascular accident |                 |
| N4                                | Ambion   | 71/Male                      | Failure to thrive          |                 |
| Pancreatic adenocarcinoma tissues |          |                              |                            |                 |
| Sample No.                        | Stage    | Differentiation              | Age (years)/gender         | Adjacent benign |
| 105T                              | I Ib     | moderately differentiated    | 55/Female                  | O               |
| 142T                              | IV       | moderate-poor differentiated | 66/Male                    | O               |
| 153T                              | Ib       | moderate-poor differentiated | 69/Female                  |                 |
| 203T                              | IIIa     | moderate-poor differentiated | 64/Male                    | O               |
| 204T                              | I Ib     | moderately differentiated    | 49/Male                    |                 |
| 228T                              | IIa      | well differentiated          | 56/Female                  |                 |
| 239T                              | IV       | moderately differentiated    | 57/Female                  |                 |
| 248T                              | I Ib     | moderately differentiated    | 53/Male                    |                 |
| 324T                              | Ib       | moderately differentiated    | 66/Male                    | O               |
| 352T                              | IIIa     | moderate-poor differentiated | 82/Male                    | O               |
| 356T                              | I Ib     | moderately differentiated    | 49/Female                  | O               |
